# Supplementary material
Source: PubMed Central journal article supplement (PMC3243534)
Supplement: supp_M111.278754_jbc.M111.278754-1.pdf [file supp_M111.278754_jbc.M111.278754-1.pdf]

**SUPPLEMENTARY FIGURE LEGENDS**

Supplementary Fig. 1. Complete mass spectra of N-glycans expressed by vehicle (DMSO) and itraconazole treated HUVEC released by PNGase F digestion. Glycans were permethylated prior to MALDI-TOF analysis. Structures were assigned taking into account the molecular weight value and knowledge of the N-glycan biosynthetic pathway. The symbol presentation of N-glycans is based on the nomenclature used in Essentials of Glycobiology textbook (<http://www.ncbi.nlm.nih.gov/books/NBK1908>) and adopted by the Consortium for Functional Glycomics (<http://www.functionalglycomics.org>). A structure containing monosaccharides outside a bracket suggests potential structural heterogeneity of the peak.

Key to symbols:

|                                                                                     |                         |
|-------------------------------------------------------------------------------------|-------------------------|
|    | Galactose               |
|    | Mannose                 |
|    | N-acetylglucosamine     |
|    | N-acetylgalactosamine   |
|    | Fucose                  |
|  | N-acetylneuraminic acid |

# Supplementary Figure 1

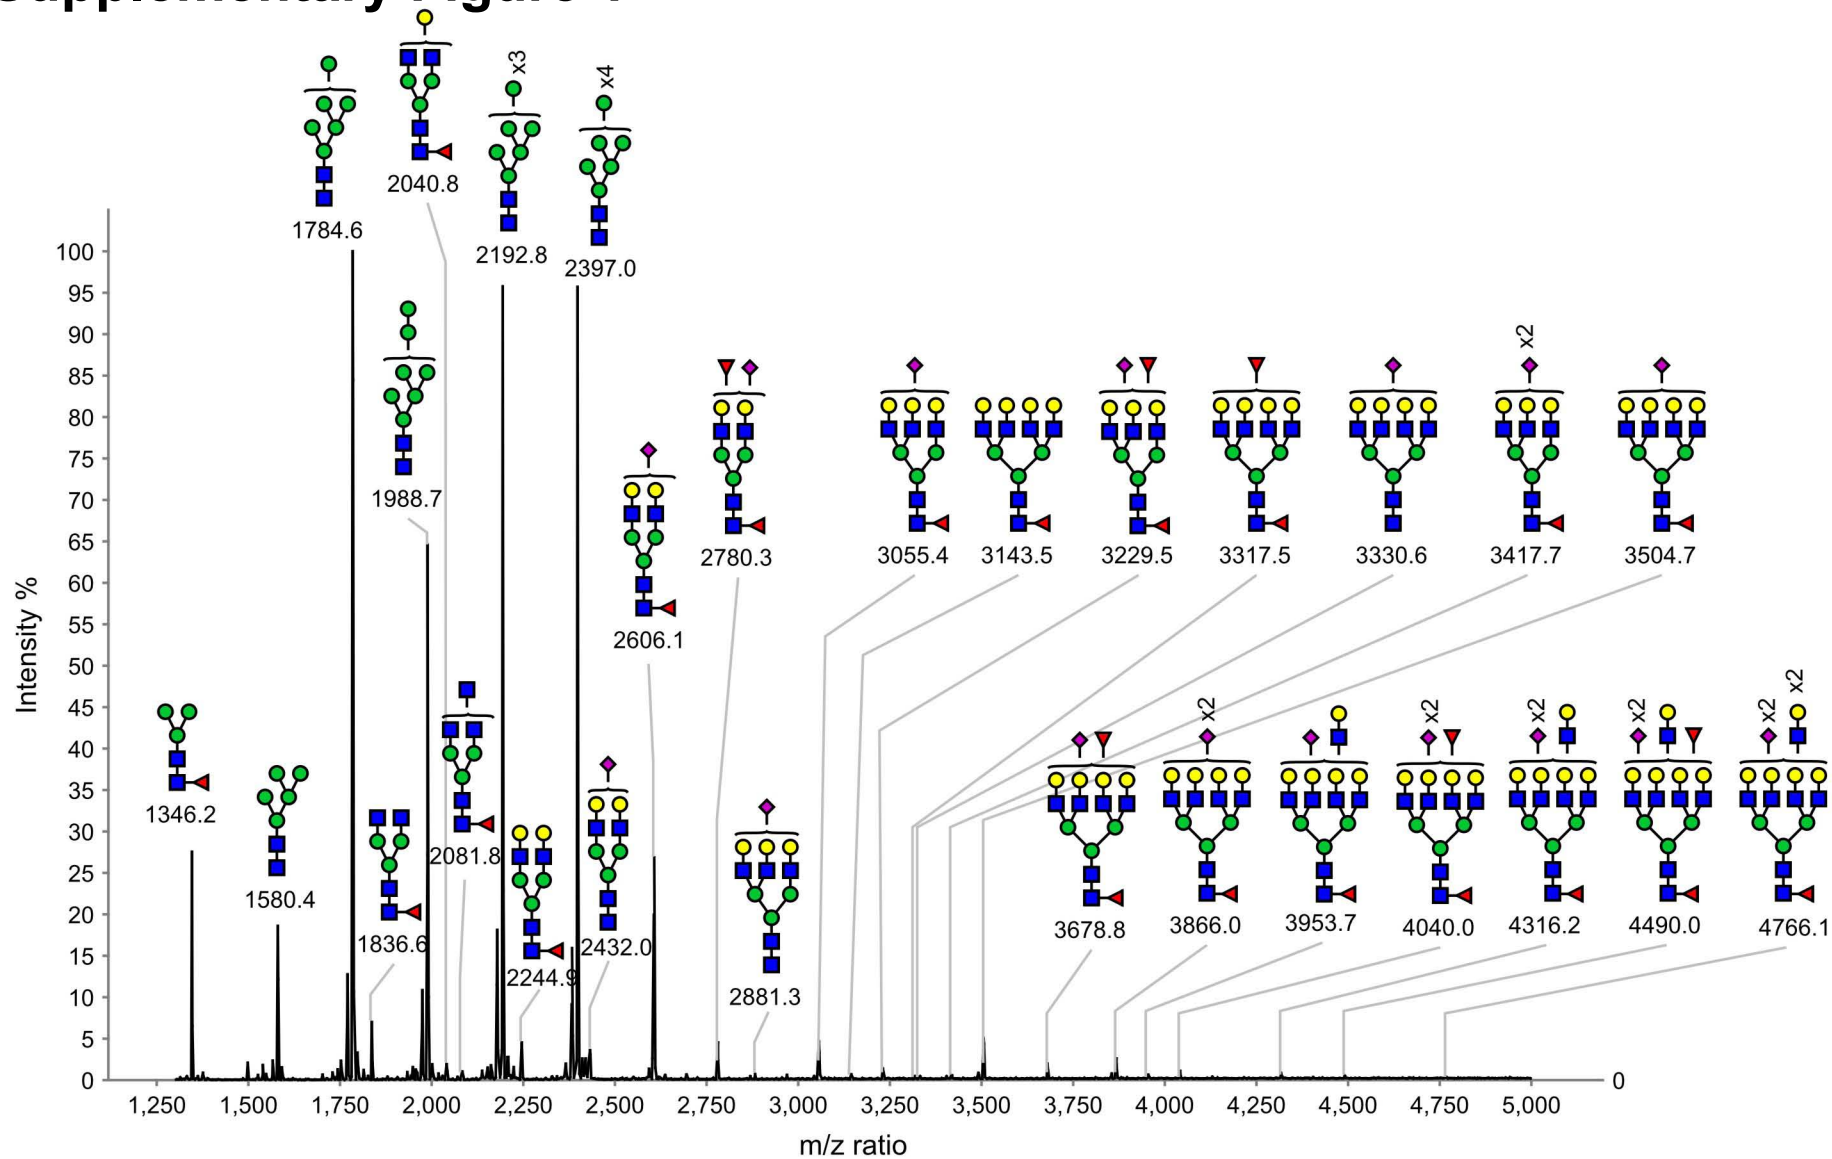

**DMSO**

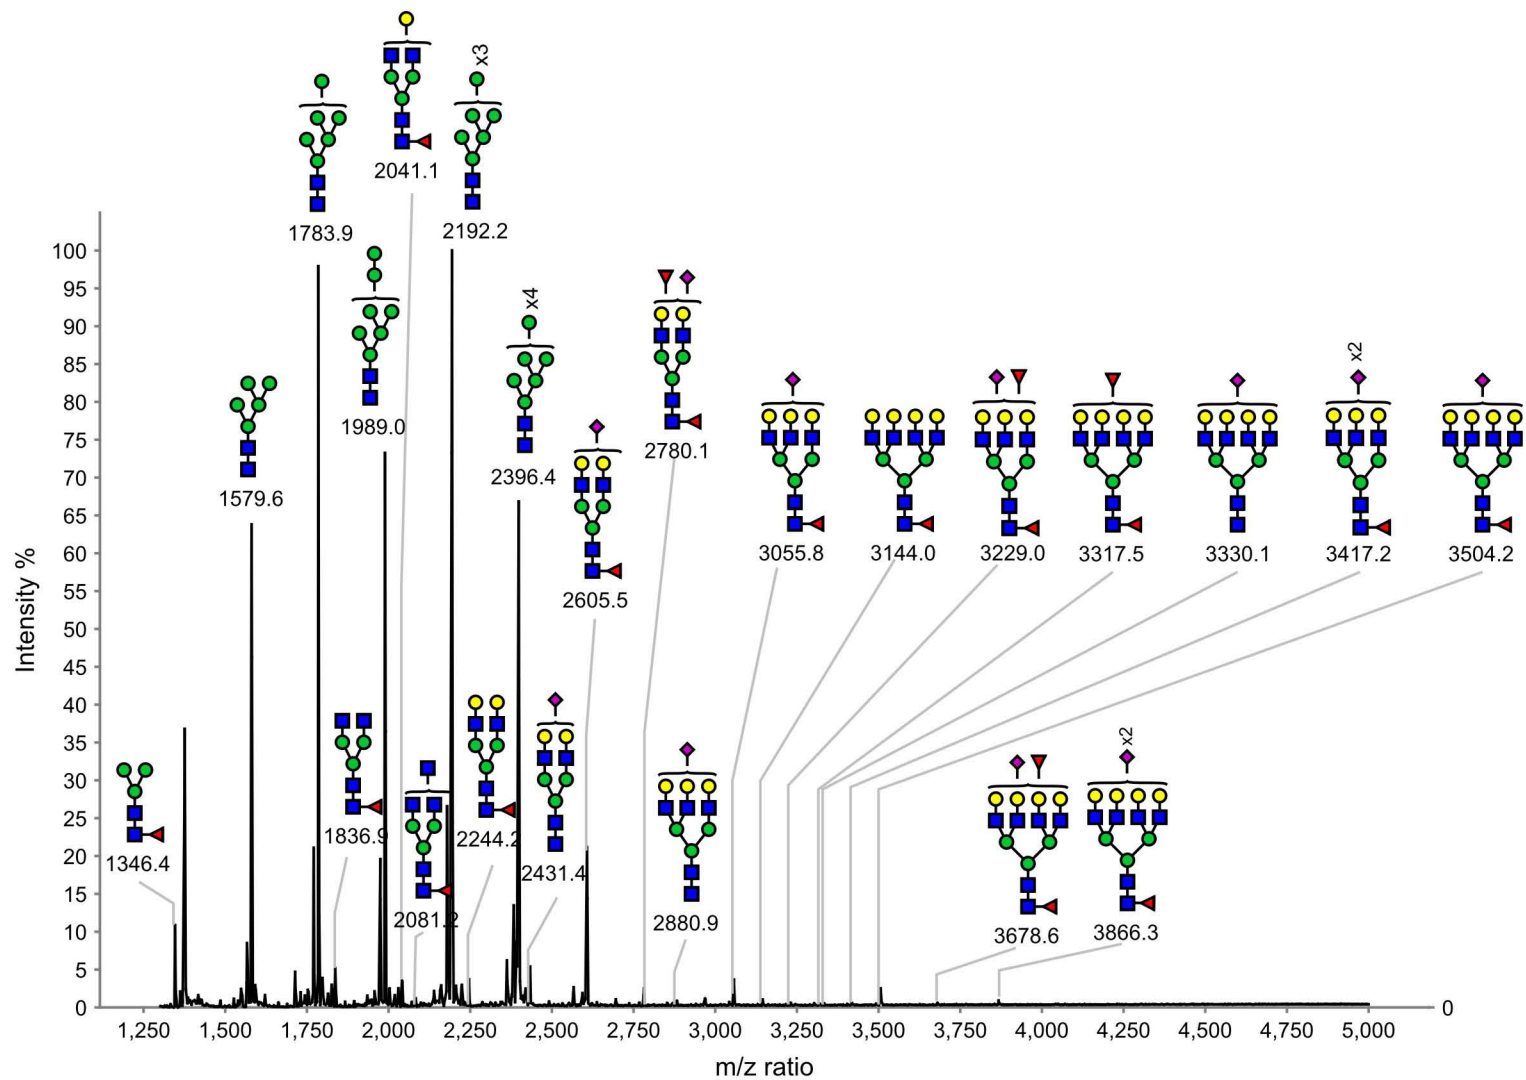

**Itraconazole**
